# Supplementary material
Source: PubMed Central journal article supplement (PMC7683369)
Supplement: NIHMS1626968-supplement-1.pdf [file NIHMS1626968-supplement-1.pdf]

**Appendix**  
**Women's Reproductive Rights Policies and Adverse Birth Outcomes: A State-Level Analysis to Assess the Role of Race and Nativity Status**  
**Sudhinaraset et al.**

**Appendix Table 1.** Crude Preterm Birth and Low Birth Weight Rate, by Race and Nativity Status

| <b>Variable</b>     | <b>Preterm birth, %</b> | <b>Low birth weight, %</b> |
|---------------------|-------------------------|----------------------------|
| U.S.-born Asian     | 9.96                    | 9.31                       |
| Foreign-born Asian  | 8.35                    | 8.24                       |
| U.S.-born Black     | 14.52                   | 14.50                      |
| Foreign-born Black  | 9.88                    | 9.46                       |
| U.S.-born Latina    | 9.87                    | 7.83                       |
| Foreign-born Latina | 8.96                    | 6.73                       |
| U.S.-born White     | 9.13                    | 7.02                       |
| Foreign-born White  | 7.69                    | 6.25                       |
